# Supplementary material for: Intracerebroventricular B7-H3 CAR T cells for children and young adults with diffuse intrinsic pontine glioma
Source: Research Square preprint supplement (doi:10.21203/rs.3.rs-5248718/v1), 2024-11-04
Supplement: Supplementary file 3 [file b1262f0929e3ee2d6282b61b.pdf]

## Reporting Summary

Nature Portfolio wishes to improve the reproducibility of the work that we publish. This form provides structure for consistency and transparency in reporting. For further information on Nature Portfolio policies, see our [Editorial Policies](#) and the [Editorial Policy Checklist](#).

### Statistics

For all statistical analyses, confirm that the following items are present in the figure legend, table legend, main text, or Methods section.

n/a Confirmed

- The exact sample size ( $n$ ) for each experimental group/condition, given as a discrete number and unit of measurement
- A statement on whether measurements were taken from distinct samples or whether the same sample was measured repeatedly
- The statistical test(s) used AND whether they are one- or two-sided  
*Only common tests should be described solely by name; describe more complex techniques in the Methods section.*
- A description of all covariates tested
- A description of any assumptions or corrections, such as tests of normality and adjustment for multiple comparisons
- A full description of the statistical parameters including central tendency (e.g. means) or other basic estimates (e.g. regression coefficient) AND variation (e.g. standard deviation) or associated estimates of uncertainty (e.g. confidence intervals)
- For null hypothesis testing, the test statistic (e.g.  $F$ ,  $t$ ,  $r$ ) with confidence intervals, effect sizes, degrees of freedom and  $P$  value noted  
*Give  $P$  values as exact values whenever suitable.*
- For Bayesian analysis, information on the choice of priors and Markov chain Monte Carlo settings
- For hierarchical and complex designs, identification of the appropriate level for tests and full reporting of outcomes
- Estimates of effect sizes (e.g. Cohen's  $d$ , Pearson's  $r$ ), indicating how they were calculated

*Our web collection on [statistics for biologists](#) contains articles on many of the points above.*

### Software and code

Policy information about [availability of computer code](#)

Data collection

Data analysis

For manuscripts utilizing custom algorithms or software that are central to the research but not yet described in published literature, software must be made available to editors and reviewers. We strongly encourage code deposition in a community repository (e.g. GitHub). See the Nature Portfolio [guidelines for submitting code & software](#) for further information.

### Data

Policy information about [availability of data](#)

All manuscripts must include a [data availability statement](#). This statement should provide the following information, where applicable:

- Accession codes, unique identifiers, or web links for publicly available datasets
- A description of any restrictions on data availability
- For clinical datasets or third party data, please ensure that the statement adheres to our [policy](#)

All requests for raw and analyzed data and materials will be promptly reviewed by the intellectual property office of Seattle Children's Research Institute to verify if the request is patient to any intellectual property or confidentiality obligations. Raw preclinical and clinical data is stored at Seattle Children's with indefinite appropriate backup. Patient-related data not included in the paper were generated as part of clinical trials and may be patient to patient confidentiality. Any data and materials that can be shared will be released via a Material Transfer Agreement.

## Research involving human participants, their data, or biological material

Policy information about studies with [human participants or human data](#). See also policy information about [sex, gender \(identity/presentation\), and sexual orientation](#) and [race, ethnicity and racism](#).

|                                                                    |                                                                                                                                                                                                                   |
|--------------------------------------------------------------------|-------------------------------------------------------------------------------------------------------------------------------------------------------------------------------------------------------------------|
| Reporting on sex and gender                                        | Patients were eligible regardless of sex and gender.                                                                                                                                                              |
| Reporting on race, ethnicity, or other socially relevant groupings | Patients were eligible regardless of race and ethnicity.                                                                                                                                                          |
| Population characteristics                                         | Characteristics are listed in Table 1                                                                                                                                                                             |
| Recruitment                                                        | There was no cost to enroll and no payments were received for enrolling. Patients were recruited either internally after a discussion of all available trials or were recruited from referrals via other centers. |
| Ethics oversight                                                   | IRB, SRC, and DMC.                                                                                                                                                                                                |

Note that full information on the approval of the study protocol must also be provided in the manuscript.

## Field-specific reporting

Please select the one below that is the best fit for your research. If you are not sure, read the appropriate sections before making your selection.

Life sciences  Behavioural & social sciences  Ecological, evolutionary & environmental sciences

For a reference copy of the document with all sections, see [nature.com/documents/nr-reporting-summary-flat.pdf](https://www.nature.com/documents/nr-reporting-summary-flat.pdf)

## Life sciences study design

All studies must disclose on these points even when the disclosure is negative.

|                 |                                               |
|-----------------|-----------------------------------------------|
| Sample size     | CONSORT information is available in Figure 1. |
| Data exclusions | There was no excluded data.                   |
| Replication     | There was no replication.                     |
| Randomization   | There was no randomization.                   |
| Blinding        | There was no blinding.                        |

## Reporting for specific materials, systems and methods

We require information from authors about some types of materials, experimental systems and methods used in many studies. Here, indicate whether each material, system or method listed is relevant to your study. If you are not sure if a list item applies to your research, read the appropriate section before selecting a response.

### Materials & experimental systems

| n/a                                 | Involvement in the study                               |
|-------------------------------------|--------------------------------------------------------|
| <input type="checkbox"/>            | <input checked="" type="checkbox"/> Antibodies         |
| <input checked="" type="checkbox"/> | <input type="checkbox"/> Eukaryotic cell lines         |
| <input checked="" type="checkbox"/> | <input type="checkbox"/> Palaeontology and archaeology |
| <input checked="" type="checkbox"/> | <input type="checkbox"/> Animals and other organisms   |
| <input type="checkbox"/>            | <input checked="" type="checkbox"/> Clinical data      |
| <input checked="" type="checkbox"/> | <input type="checkbox"/> Dual use research of concern  |
| <input checked="" type="checkbox"/> | <input type="checkbox"/> Plants                        |

### Methods

| n/a                                 | Involvement in the study                                   |
|-------------------------------------|------------------------------------------------------------|
| <input checked="" type="checkbox"/> | <input type="checkbox"/> ChIP-seq                          |
| <input type="checkbox"/>            | <input checked="" type="checkbox"/> Flow cytometry         |
| <input type="checkbox"/>            | <input checked="" type="checkbox"/> MRI-based neuroimaging |

## Antibodies

|                 |                                                                                                                                                                                                                                                                                                                                                                                                 |
|-----------------|-------------------------------------------------------------------------------------------------------------------------------------------------------------------------------------------------------------------------------------------------------------------------------------------------------------------------------------------------------------------------------------------------|
| Antibodies used | Live/dead cell viability was assessed by a viability dye (BD Biosciences). The following fluorophore-conjugated anti-human monoclonal antibodies were utilized: CD3, CD4, CD8a, with or without CD36 (BD Biosciences). CAR T cell expression was quantified by detecting EGFRt transduction tag using cetuximab custom-conjugated to allophycocyanin (BD Biosciences). Additionally, cells were |
|-----------------|-------------------------------------------------------------------------------------------------------------------------------------------------------------------------------------------------------------------------------------------------------------------------------------------------------------------------------------------------------------------------------------------------|

stained with custom-biotinylated trastuzumab followed by streptavidin (BD Bioscience) for detection of a HER2 tag, which was not relevant to this trial. CAR T cells were identified as singlets/lymphocytes/viable cells and characterized by the phenotype CD3+/EGFRt + HER2- (with or without CD36-). The expression of CD4 and CD8 expression in both CAR+ and CAR- populations was evaluated. Representative flow gating strategies are provided in Extended Data Figure 1.

Validation Antibodies were validated mirroring manufacturer validation.

## Clinical data

Policy information about [clinical studies](#)

All manuscripts should comply with the ICMJE [guidelines for publication of clinical research](#) and a completed [CONSORT checklist](#) must be included with all submissions.

Clinical trial registration NCT04185038

Study protocol BrainChild-03

Data collection BrainChild-03 began accrual on November 22, 2019. Clinical data through March 31, 2024, is included.

Outcomes The primary objectives were: To assess the feasibility of CNS locoregional adoptive therapy with autologous CD4+ and CD8+ T cells lentivirally transduced to express a B7-H3-specific CAR and EGFRt, delivered by an indwelling catheter into the tumor cavity or ventricular system in children and young adults with DIPG, DMG, or recurrent/refractory CNS tumors; To assess the safety of CNS locoregional adoptive therapy with autologous CD4+ and CD8+ T cells lentivirally transduced to express a B7-H3-specific CAR and EGFRt, delivered by an indwelling catheter into the tumor cavity or ventricular system in children and young adults with DIPG, DMG, or recurrent/refractory CNS tumors; To establish the tolerability of a fractionated CNS-delivered B7-H3 CAR T cell infusion schedule employing intra-subject dose escalation in children and young adults with DIPG, DMG, or recurrent/refractory CNS tumors; To define the maximally tolerated dose (MTD) and recommended Phase 2 dose regimen (RP2DR) of CNS-delivered fractionated B7-H3 CAR T cell infusions. The secondary objectives were: The secondary objectives are: To assess B7-H3 CAR T cell distribution within the cerebrospinal fluid (CSF) and the extent to which B7-H3 CAR T cells egress into the peripheral circulation; and To assess disease response to B7-H3 CAR T cell locoregional therapy in children and young adults with DIPG, DMG, or recurrent/refractory CNS tumors.

## Plants

Seed stocks n/a

Novel plant genotypes n/a

Authentication n/a

## Flow Cytometry

### Plots

Confirm that:

- The axis labels state the marker and fluorochrome used (e.g. CD4-FITC).
- The axis scales are clearly visible. Include numbers along axes only for bottom left plot of group (a 'group' is an analysis of identical markers).
- All plots are contour plots with outliers or pseudocolor plots.
- A numerical value for number of cells or percentage (with statistics) is provided.

### Methodology

Sample preparation Patient cerebrospinal fluid (CSF) samples were collected via lumbar puncture or ventricular catheter and kept at 4°C until processing. The samples underwent serial centrifugation: first at 250xg for 10 minutes to remove cells, followed by a final centrifugation at 10,000xg for 10 minutes to remove any remaining debris. The cell-free supernatant was then aliquoted and cryopreserved at -80°C. CSF immunophenotyping: Immunophenotyping of surface markers on cells isolated from the CSF specimens was conducted using standard staining protocols followed by flow cytometry analysis.

Instrument Flow analysis was performed on an LSRFortessa (BD Biosciences), sort-purifications on a FACSArialI (BD Biosciences).

|                           |                                                                                                                                                                                                                                                                                                                                                                                        |
|---------------------------|----------------------------------------------------------------------------------------------------------------------------------------------------------------------------------------------------------------------------------------------------------------------------------------------------------------------------------------------------------------------------------------|
| Software                  | FlowJo                                                                                                                                                                                                                                                                                                                                                                                 |
| Cell population abundance | Samples with lymphocytes count under the limit of quantitation (LOQ) requirement for the assay were excluded from reporting. CAR T cell detection status is determined by a combination of at least one detectable EGFRt+ cell count in the sample, as well as the level of Lymphocytes/EGFRt+% cell in the sample to be above the pre-defined limit of detection (LOD) for the assay. |
| Gating strategy           | Shown in Extended Data Figure 1.                                                                                                                                                                                                                                                                                                                                                       |

Tick this box to confirm that a figure exemplifying the gating strategy is provided in the Supplementary Information.

## Magnetic resonance imaging

### Experimental design

|                                 |                                               |
|---------------------------------|-----------------------------------------------|
| Design type                     | MRI brain and spine with and without contrast |
| Design specifications           | MRI per standard neuroradiology protocoling   |
| Behavioral performance measures | n/a                                           |

### Acquisition

|                               |                                                                                                                                                                                           |
|-------------------------------|-------------------------------------------------------------------------------------------------------------------------------------------------------------------------------------------|
| Imaging type(s)               | MRI including sequences such as T1, T1 with contrast, T2, T2 FLAIR, and ADC.                                                                                                              |
| Field strength                | Varied between 0.2 T to 11.7 T                                                                                                                                                            |
| Sequence & imaging parameters | <i>Specify the pulse sequence type (gradient echo, spin echo, etc.), imaging type (EPI, spiral, etc.), field of view, matrix size, slice thickness, orientation and TE/TR/flip angle.</i> |
| Area of acquisition           | brain and spinal cord                                                                                                                                                                     |
| Diffusion MRI                 | <input checked="" type="checkbox"/> Used <input type="checkbox"/> Not used                                                                                                                |
| Parameters                    | <i>Specify # of directions, b-values, whether single shell or multi-shell, and if cardiac gating was used.</i>                                                                            |

### Preprocessing

|                            |     |
|----------------------------|-----|
| Preprocessing software     | n/a |
| Normalization              | n/a |
| Normalization template     | n/a |
| Noise and artifact removal | n/a |
| Volume censoring           | n/a |

### Statistical modeling & inference

|                                           |                                                                                                       |
|-------------------------------------------|-------------------------------------------------------------------------------------------------------|
| Model type and settings                   | n/a                                                                                                   |
| Effect(s) tested                          | n/a                                                                                                   |
| Specify type of analysis:                 | <input type="checkbox"/> Whole brain <input type="checkbox"/> ROI-based <input type="checkbox"/> Both |
| Statistic type for inference              | n/a                                                                                                   |
| (See <a href="#">Eklund et al. 2016</a> ) |                                                                                                       |
| Correction                                | n/a                                                                                                   |

## Models & analysis

- n/a | Involved in the study
- Functional and/or effective connectivity
  - Graph analysis
  - Multivariate modeling or predictive analysis
